# Supplementary material
Source: Research Square preprint supplement (doi:10.21203/rs.3.rs-9599036/v1)
Supplement: Supplementary file 1 [file fa6cfb79143921ac88a05c1d.docx]

**Supplementary Table S1**

*Indirect, direct, and total associations between maternal bonding and symptom distress*

| Predictor | Mediator | β | 95% CI |
| --- | --- | --- | --- |
| Maternal Care | Emotional Reactivity | .003 | −0.11, 0.15 |
|  | I-Position | .030 | 0.06, 0.32 |
|  | Emotional Cutoff | .084 | 0.33, 0.63 |
|  | Fusion with Others | .002 | −0.01, 0.08 |
|  | Direct effect | .042 | −0.06, 0.55 |
|  | Total effect | .161 | 0.54, 1.31 |
| Maternal Overprotection | Emotional Reactivity | −.028 | −0.18, −0.02 |
|  | I-Position | −.031 | −0.19, −0.03 |
|  | Emotional Cutoff | −.051 | −0.26, −0.09 |
|  | Fusion with Others | .002 | −0.01, 0.05 |
|  | Direct effect | −.020 | −0.25, 0.10 |
|  | Total effect | −.128 | −0.69, −0.21 |

*Note*. *β* = standardized coefficient. Confidence intervals are bias-corrected bootstrap (5,000 resamples). Indirect associations are considered statistically significant when the CI does not include zero.

**Supplementary Table S2**

*Indirect, direct, and total associations between paternal bonding and symptom distress*

| **Predictor** | **Mediator** | **β** | **95% CI** |
| --- | --- | --- | --- |
| **Paternal Care** | Emotional Reactivity | .019 | −0.03, 0.19 |
|  | I-Position | .041 | 0.07, 0.30 |
|  | Emotional Cutoff | .078 | 0.21, 0.47 |
|  | Fusion with Others | .001 | −0.01, 0.05 |
|  | Direct effect | .049 | −0.04, 0.43 |
|  | Total effect | .187 | 0.47, 1.15 |
| **Paternal Overprotection** | Emotional Reactivity | .011 | −0.07, 0.20 |
|  | I-Position | −.002 | −0.14, 0.12 |
|  | Emotional Cutoff | .033 | 0.04, 0.32 |
|  | Fusion with Others | .000 | −0.01, 0.06 |
|  | Direct effect | −.044 | −0.50, 0.06 |
|  | Total effect | .000 | −0.42, 0.40 |

Note. *β* = standardized coefficient. Confidence intervals are bias-corrected bootstrap (5,000 resamples). Indirect associations are considered statistically significant when the CI does not include zero.

**Supplementary Table S3**

*Indirect, direct, and total associations between maternal bonding and relational distress*

| **Predictor** | **Mediator** | **β** | **95% CI** |
| --- | --- | --- | --- |
| **Maternal Care** | Emotional Reactivity | .002 | −0.02, 0.03 |
|  | I-Position | .016 | 0.01, 0.07 |
|  | Emotional Cutoff | .117 | 0.18, 0.34 |
|  | Fusion with Others | .001 | −0.00, 0.03 |
|  | Direct effect | .094 | 0.07, 0.33 |
|  | Total effect | .230 | 0.35, 0.66 |
| **Maternal Overprotection** | Emotional Reactivity | −.013 | −0.04, 0.00 |
|  | I-Position | −.016 | −0.04, −0.01 |
|  | Emotional Cutoff | −.071 | −0.14, −0.06 |
|  | Fusion with Others | .002 | −0.00, 0.02 |
|  | Direct effect | −.063 | −0.16, 0.01 |
|  | Total effect | −.163 | −0.31, −0.11 |

***Note.****β* = standardized coefficient. Confidence intervals are bias-corrected bootstrap (5,000 resamples). Indirect associations are interpreted as statistically significant when the CI does not include zero.

**Supplementary Table S4**

***Indirect, direct, and total associations between paternal bonding and relationship distress***

| **Predictor** | **Mediator** | **β** | **95% CI** |
| --- | --- | --- | --- |
| **Paternal Care** | Emotional Reactivity | .009 | −0.00, 0.04 |
|  | I-Position | .020 | 0.01, 0.07 |
|  | Emotional Cutoff | .112 | 0.12, 0.26 |
|  | Fusion with Others | .001 | −0.00, 0.02 |
|  | Direct effect | .104 | 0.07, 0.28 |
|  | Total effect | .245 | 0.28, 0.53 |
| **Paternal Overprotection** | Emotional Reactivity | .006 | −0.01, 0.05 |
|  | I-Position | −.001 | −0.03, 0.02 |
|  | Emotional Cutoff | .048 | 0.02, 0.19 |
|  | Fusion with Others | .000 | −0.01, 0.01 |
|  | Direct effect | −.004 | −0.14, 0.13 |
|  | Total effect | .049 | −0.07, 0.27 |

***Note*.** *β* = standardized coefficient. Confidence intervals are bias-corrected bootstrap (5,000 resamples). Indirect associations are interpreted as statistically significant when the CI does not include zero.

**Supplementary Table S5**-***Indirect, direct, and total associations between maternal bonding and role distress***

| **Predictor** | **Mediator** | **β** | **95% CI** |
| --- | --- | --- | --- |
| **Maternal Care** | Emotional Reactivity | .002 | −0.02, 0.03 |
|  | I-Position | .013 | 0.00, 0.05 |
|  | Emotional Cutoff | .076 | 0.09, 0.18 |
|  | Fusion with Others | −.002 | −0.03, 0.00 |
|  | Direct effect | .041 | −0.04, 0.19 |
|  | Total effect | .130 | 0.10, 0.34 |
| **Maternal Overprotection** | Emotional Reactivity | −.018 | −0.04, −0.00 |
|  | I-Position | −.013 | −0.03, −0.00 |
|  | Emotional Cutoff | −.047 | −0.07, −0.03 |
|  | Fusion with Others | −.003 | −0.02, 0.00 |
|  | Direct effect | −.039 | −0.11, 0.04 |
|  | Total effect | −.120 | −0.20, −0.03 |

***Note*.** *β* = standardized coefficient. Confidence intervals are bias-corrected bootstrap (5,000 resamples). Indirect associations are interpreted as statistically significant when the CI does not include zero.

**Supplementary Table S6**

***Indirect, direct, and total associations between paternal bonding and role distress***

| **Predictor** | **Mediator** | **β** | **95% CI** |
| --- | --- | --- | --- |
| **Paternal Care** | Emotional Reactivity | .012 | −0.00, 0.04 |
|  | I-Position | .016 | 0.01, 0.05 |
|  | Emotional Cutoff | .071 | 0.06, 0.14 |
|  | Fusion with Others | −.002 | −0.02, 0.00 |
|  | Direct effect | .053 | −0.02, 0.16 |
|  | Total effect | .149 | 0.09, 0.29 |
| **Paternal Overprotection** | Emotional Reactivity | .007 | −0.01, 0.04 |
|  | I-Position | −.001 | −0.02, 0.01 |
|  | Emotional Cutoff | .030 | 0.01, 0.10 |
|  | Fusion with Others | −.001 | −0.02, 0.01 |
|  | Direct effect | −.058 | −0.20, 0.02 |
|  | Total effect | −.022 | −0.17, 0.09 |

***Note*.** β = standardized coefficient. Confidence intervals are bias-corrected bootstrap (5,000 resamples). Indirect associations are interpreted as statistically significant when the CI does not include zero.
